# Supplementary material for: Discovery of two ent-atisane diterpenoid lactones with AChE inhibitory activity from the roots of Euphorbia fischeriana
Source: Royal Society of Chemistry journal article supplement (doi:10.1039/d3ob01007d), 2023-01-01
Supplement: d3ob01007d1.pdf [file d3ob01007d1.pdf]

Supporting Information For

## Discovery of two *ent*-atisane diterpenoid lactones with AChE inhibitory activity from the roots of *Euphorbia fischeriana*

Jiangchun Wei<sup>a,b,c†</sup>, Zhiyue Li<sup>a,b†</sup>, Min Shan<sup>d</sup>, Fengzhi Wu<sup>e</sup>, Limin Li<sup>a</sup>, Yucui Ma<sup>a</sup>, Junhong Wu<sup>a</sup>, Xinping Li<sup>a</sup>, Yaqian Liu<sup>a</sup>, Zhengxi Hu<sup>c\*</sup>, Yonghui Zhang<sup>c\*</sup> and Zhengzhi Wu<sup>a,b\*</sup>

Euphorlactone A (**1**), a rare rearranged *ent*-atisane norditerpenoid with an undescribed 3-*nor*-2,4-olide-*ent*-atisane scaffold, together with euphorlactone B (**2**), a new *ent*-atisane diterpenoid with an unprecedented seven-membered lactone ring C, were isolated from the roots of *Euphorbia fischeriana*. Their planar structures incorporating absolute configurations were extensively elucidated by analysis of the 1D and 2D NMR data, electronic circular dichroism (ECD) calculations, Rh<sub>2</sub>(OCOCF<sub>3</sub>)<sub>4</sub>-induced ECD curve, and single-crystal X-ray diffraction. Euphorlactone A (ELA) showed a remarkable AChE (acetylcholinesterase) inhibitory activity (IC<sub>50</sub> = 2.13 ± 0.06 μM, K<sub>i</sub> = 0.058 μM), which was five times stronger than the positive control (rivastigmine, IC<sub>50</sub> = 12.46 ± 0.82 μM), and further *in vitro* enzyme inhibition kinetic analysis and molecular docking studies were performed to investigate the AChE inhibitory mechanism.

|                                                                                                                                                                                                                                                   |    |
|---------------------------------------------------------------------------------------------------------------------------------------------------------------------------------------------------------------------------------------------------|----|
| <b>S1.</b> General Experimental Procedures.....                                                                                                                                                                                                   | 1  |
| <b>S2.</b> X-ray crystallographic analysis of <b>1</b> .....                                                                                                                                                                                      | 1  |
| <b>Table S2-1</b> Crystal data and structure refinement for <b>1</b> .....                                                                                                                                                                        | 1  |
| <b>Table S2-2</b> Fractional Atomic Coordinates ( $\times 10^4$ ) and Equivalent Isotropic Displacement Parameters ( $\text{\AA}^2 \times 10^3$ ) for <b>1</b> . $U_{eq}$ is defined as 1/3 of of the trace of the orthogonalised UIJ tensor..... | 2  |
| <b>Table S2-3</b> Anisotropic Displacement Parameters ( $\text{\AA}^2 \times 10^3$ ) for <b>1</b> . The Anisotropic displacement factor exponent takes the form: $-2\pi^2[h^2a^{*2}U_{11}+2hka^*b^*U_{12}+...]$ . ....                            | 3  |
| <b>Table S2-4</b> Bond Lengths <b>1</b> .....                                                                                                                                                                                                     | 3  |
| <b>Table S2-5</b> Bond Angles for <b>1</b> .....                                                                                                                                                                                                  | 3  |
| <b>Table S2-6</b> Torsion Angles for <b>1</b> . ....                                                                                                                                                                                              | 4  |
| <b>Table S2-7</b> Hydrogen Atom Coordinates ( $\text{\AA} \times 10^4$ ) and Isotropic Displacement Parameters ( $\text{\AA}^2 \times 10^3$ ) for <b>1</b> . ....                                                                                 | 5  |
| <b>S3.</b> Calculation of ECD Spectra for <b>1</b> .....                                                                                                                                                                                          | 6  |
| <b>Figure S3.</b> Experimental and calculated ECD spectra of <b>1</b> in MeOH. ....                                                                                                                                                               | 6  |
| <b>Table S3.</b> Energy Analysis for the Conformers of <b>1</b> . ....                                                                                                                                                                            | 6  |
| <b>Figure S3.</b> B3lyp/6-311g**/20 optimized low-energy conformers of <b>1</b> . ....                                                                                                                                                            | 6  |
| <b>S4.</b> Calculation of ECD Spectra for <b>2</b> .....                                                                                                                                                                                          | 6  |
| <b>Table S4.</b> Energy Analysis for the Conformers of <b>2</b> . ....                                                                                                                                                                            | 7  |
| <b>Figure S4.</b> B3lyp/6-311g**/20 optimized low-energy conformers of <b>2</b> . ....                                                                                                                                                            | 7  |
| <b>S5.</b> IC <sub>50</sub> Data of compound <b>1</b> .....                                                                                                                                                                                       | 7  |
| <b>Table S5-1.</b> The residual activity of acetylcholinesterase was incubated with different concentrations of <b>1</b> in an <i>in vitro</i> activity screening model ( $\bar{X} \pm S$ , n = 3).....                                           | 7  |
| <b>Table S5-2.</b> Transform X of Table S11-2 ( $\bar{X} \pm S$ , n = 3). ....                                                                                                                                                                    | 8  |
| <b>Table S5-3.</b> The calculation interface of IC <sub>50</sub> value of compound <b>1</b> . ....                                                                                                                                                | 8  |
| <b>S6.</b> Inhibition kinetic data of compound <b>1</b> .....                                                                                                                                                                                     | 9  |
| <b>Table S6-1.</b> Inhibition kinetics of ELA towards AChE ( $\bar{X} \pm S$ , n = 3). ....                                                                                                                                                       | 9  |
| <b>Table S6-2.</b> The analysis results of inhibition kinetic data $K_m$ and $V_{max}$ of compound <b>1</b> . ....                                                                                                                                | 9  |
| <b>S7.</b> Spectroscopic data .....                                                                                                                                                                                                               | 10 |

|                                                                                                               |    |
|---------------------------------------------------------------------------------------------------------------|----|
| <b>Figure S7-1.</b> The HR-ESIMS Spectrum of compound <b>1</b> .....                                          | 10 |
| <b>Figure S7-2.</b> CD Spectra of compound <b>1</b> .....                                                     | 11 |
| <b>Figure S7-3.</b> The <sup>1</sup> H-NMR Spectrum of compound <b>1</b> in CDCl <sub>3</sub> (400MHz).....   | 11 |
| <b>Figure S7-4.</b> The <sup>13</sup> C-NMR Spectrum of compound <b>1</b> in CDCl <sub>3</sub> (100MHz).....  | 12 |
| <b>Figure S7-5.</b> The HSQC Spectrum of compound <b>1</b> in CDCl <sub>3</sub> (400MHz) .....                | 13 |
| <b>Figure S7-6.</b> The HMBC Spectrum of compound <b>1</b> in CDCl <sub>3</sub> (400MHz).....                 | 14 |
| <b>Figure S7-7.</b> The COSY Spectrum of compound <b>1</b> in CDCl <sub>3</sub> (400MHz) .....                | 15 |
| <b>Figure S7-8.</b> The NOESY Spectrum of compound <b>1</b> in CDCl <sub>3</sub> (400MHz) .....               | 16 |
| <b>Figure S7-9.</b> The HR-ESIMS Spectrum of compound <b>2</b> .....                                          | 16 |
| <b>Figure S7-10.</b> CD Spectra of compound <b>2</b> .....                                                    | 17 |
| <b>Figure S7-11.</b> The <sup>1</sup> H-NMR Spectrum of compound <b>2</b> in CDCl <sub>3</sub> (600MHz).....  | 17 |
| <b>Figure S7-12.</b> The <sup>13</sup> C-NMR Spectrum of compound <b>2</b> in CDCl <sub>3</sub> (150MHz)..... | 18 |
| <b>Figure S7-13.</b> The HSQC Spectrum of compound <b>2</b> in CDCl <sub>3</sub> (600MHz) .....               | 19 |
| <b>Figure S7-14.</b> The HMBC Spectrum of compound <b>2</b> in CDCl <sub>3</sub> (600MHz).....                | 20 |
| <b>Figure S7-15.</b> The COSY Spectrum of compound <b>2</b> in CDCl <sub>3</sub> (600MHz).....                | 21 |
| <b>Figure S7-16.</b> The NOESY Spectrum of compound <b>2</b> in CDCl <sub>3</sub> (600MHz) .....              | 22 |
| <b>S8.</b> References.....                                                                                    | 22 |

## S1. General Experimental Procedures

UV spectra were recorded on a JASCO V-650 UV spectrophotometer. MP was determined by a BUCHI B-540 melting point apparatus. Optical rotations were measured with on a JASCO P2000 automatic polarimeter. <sup>1</sup>D- and <sup>2</sup>D-NMR spectra were recorded on a Bruker Avance 600/400 spectrometer with solvent peaks as references. HRESIMS data were obtained with an Agilent 1290 Infinity liquid chromatography system and an Agilent 6540 UHD Accurate-Mass Q-TOF mass spectrometer. High-performance liquid chromatography (HPLC) data were recorded on an Agilent 1260 instrument equipped with a photo-diode array (PDA) and a YMC C<sub>18</sub> column (250 × 4.6 mm, 5 μm). Preparative HPLC was a performed on Sanotac instrument China with a UV detector and a YMC C<sub>18</sub> column (250 × 20 mm, 5 μm). Column chromatographic separations were carried out with silica gel (200-300 mesh, Qingdao Marine Chemical Group Corporation, Qingdao, China), MCI gel CHP20P (75-150 μm, Mitsubishi Chemical Co., Japan) and ODS (50 μm, YMC, Kyoto, Japan). TLC was conducted with glass precoated with silica gel GF254 (Yantai Chemical Industrial Institute, Yantai, China). Chromatographic grade methanol and acetonitrile were purchased from Fisher. All other solvents were of chemical grade (Da Mao Chemical Co. Ltd, Tianjin, China).

## S2. X-ray crystallographic analysis of **1**

Colorless columnar crystals of **1** were grown by slow evaporation in MeOH/DCM (1:1, v/v) solution. Crystal data were obtained on an Xcalibur Eos Gemini diffractometer with graphite-monochromated Cu-Kα radiation ( $\lambda = 1.54184\text{\AA}$ ).

Crystal data of **1**: C<sub>19</sub>H<sub>26</sub>O<sub>3</sub> ( $M = 302.40$  g/mol): orthorhombic, space group P2<sub>1</sub>2<sub>1</sub>2<sub>1</sub> (no. 19),  $a = 6.22994(11)$  Å,  $b = 10.47670(16)$  Å,  $c = 24.3448(4)$  Å,  $V = 1588.96(4)$  Å<sup>3</sup>,  $Z = 4$ ,  $T = 150.00(10)$  K,  $\mu(\text{Cu K}\alpha) = 0.664$  mm<sup>-1</sup>,  $D_{\text{calc}} = 1.264$  g/cm<sup>3</sup>, 6671 reflections measured ( $7.262^\circ \leq 2\theta \leq 147.604^\circ$ ), 2997 unique ( $R_{\text{int}} = 0.0163$ ,  $R_{\text{sigma}} = 0.0188$ ) which were used in all calculations. The final  $R_1$  was 0.0281 ( $I > 2\sigma(I)$ ) and  $wR_2$  was 0.0744 (all data), Flack parameter = 0.04(7).

The X-ray crystallographic data of compounds **1** have been deposited at the Cambridge Crystallographic Data Center with deposition numbers CCDC 2096385, which can be obtained free of charge from the [www.ccdc.cam.ac.uk](http://www.ccdc.cam.ac.uk).

**Table S2-1** Crystal data and structure refinement for **1**.

| Identification code | <b>1</b>                                       |
|---------------------|------------------------------------------------|
| Empirical formula   | C <sub>19</sub> H <sub>26</sub> O <sub>3</sub> |
| Formula weight      | 302.40                                         |
| Temperature/K       | 150.00(10)                                     |
| Crystal system      | orthorhombic                                   |
| Space group         | P2 <sub>1</sub> 2 <sub>1</sub> 2 <sub>1</sub>  |
| a/Å                 | 6.22994(11)                                    |
| b/Å                 | 10.47670(16)                                   |
| c/Å                 | 24.3448(4)                                     |
| $\alpha/^\circ$     | 90                                             |
| $\beta/^\circ$      | 90                                             |
| $\gamma/^\circ$     | 90                                             |

|                                             |                                                               |
|---------------------------------------------|---------------------------------------------------------------|
| Volume/Å <sup>3</sup>                       | 1588.96(4)                                                    |
| Z                                           | 4                                                             |
| $\rho_{\text{calc}}/\text{cm}^3$            | 1.264                                                         |
| $\mu/\text{mm}^{-1}$                        | 0.664                                                         |
| F(000)                                      | 656.0                                                         |
| Crystal size/mm <sup>3</sup>                | 0.14 × 0.11 × 0.09                                            |
| Radiation                                   | Cu K $\alpha$ ( $\lambda = 1.54184$ )                         |
| 2 $\theta$ range for data collection/°      | 7.262 to 147.604                                              |
| Index ranges                                | -4 ≤ h ≤ 7, -12 ≤ k ≤ 12, -29 ≤ l ≤ 29                        |
| Reflections collected                       | 6671                                                          |
| Independent reflections                     | 2997 [R <sub>int</sub> = 0.0163, R <sub>sigma</sub> = 0.0188] |
| Data/restraints/parameters                  | 2997/0/210                                                    |
| Goodness-of-fit on F <sup>2</sup>           | 1.089                                                         |
| Final R indexes [ $ I  > 2\sigma(I)$ ]      | R <sub>1</sub> = 0.0281, wR <sub>2</sub> = 0.0739             |
| Final R indexes [all data]                  | R <sub>1</sub> = 0.0285, wR <sub>2</sub> = 0.0744             |
| Largest diff. peak/hole / e Å <sup>-3</sup> | 0.11/-0.19                                                    |
| Flack/Hoof parameter                        | 0.04(7)/0.07(6)                                               |

**Table S2-2** Fractional Atomic Coordinates (×10<sup>4</sup>) and Equivalent Isotropic Displacement Parameters (Å<sup>2</sup>×10<sup>3</sup>) for 1. U<sub>eq</sub> is defined as 1/3 of the trace of the orthogonalised U<sub>ij</sub> tensor.

| Atom | x          | y          | z         | U(eq)   |
|------|------------|------------|-----------|---------|
| O1   | 9488(2)    | 2579.9(11) | 7872.4(5) | 37.7(3) |
| O2   | 1549.3(18) | 3996.3(12) | 5637.4(5) | 32.6(3) |
| O3   | 8576(3)    | 1389.0(11) | 7176.0(5) | 40.3(3) |
| C1   | 8197(3)    | 3715.1(14) | 7090.9(6) | 24.6(3) |
| C2   | 8782(3)    | 2537.3(16) | 7410.2(6) | 27.7(3) |
| C4   | 7714(3)    | 1133.1(16) | 6618.6(6) | 29.0(4) |
| C5   | 7287(2)    | 2372.0(14) | 6293.1(6) | 22.4(3) |
| C6   | 5850(3)    | 2154.5(14) | 5788.9(6) | 24.8(3) |
| C7   | 5886(3)    | 3327.8(13) | 5418.7(6) | 23.2(3) |
| C8   | 5303(2)    | 4561.8(14) | 5716.9(6) | 20.3(3) |
| C9   | 6558(2)    | 4712.1(13) | 6264.7(6) | 20.2(3) |
| C10  | 6503(2)    | 3513.9(14) | 6641.9(6) | 21.3(3) |
| C11  | 5956(3)    | 5989.9(14) | 6553.6(6) | 24.4(3) |
| C12  | 4374(2)    | 6754.7(14) | 6198.2(6) | 23.5(3) |
| C13  | 2346(2)    | 5941.3(15) | 6119.7(6) | 24.5(3) |
| C14  | 2903(2)    | 4724.6(15) | 5811.9(6) | 22.8(3) |
| C15  | 5918(3)    | 5728.2(14) | 5356.7(6) | 24.4(3) |
| C16  | 5360(3)    | 6972.3(15) | 5638.9(6) | 24.5(3) |
| C17  | 5646(3)    | 8104.2(16) | 5412.9(7) | 34.9(4) |
| C18  | 9468(3)    | 361.9(16)  | 6338.8(8) | 38.7(4) |
| C19  | 5766(3)    | 289.0(16)  | 6722.3(7) | 36.7(4) |
| C20  | 4299(3)    | 3296.5(15) | 6910.5(6) | 25.3(3) |

**Table S2-3** Anisotropic Displacement Parameters ( $\text{\AA}^2 \times 10^3$ ) for **1**. The Anisotropic displacement factor exponent takes the form:  $-2\pi^2[h^2a^{*2}U_{11}+2hka^*b^*U_{12}+\dots]$ .

| Atom | U <sub>11</sub> | U <sub>22</sub> | U <sub>33</sub> | U <sub>23</sub> | U <sub>13</sub> | U <sub>12</sub> |
|------|-----------------|-----------------|-----------------|-----------------|-----------------|-----------------|
| O1   | 49.5(8)         | 37.4(6)         | 26.1(6)         | 4.9(5)          | -12.1(5)        | -2.3(6)         |
| O2   | 22.7(5)         | 37.0(6)         | 37.9(6)         | -9.3(5)         | -1.5(5)         | -6.6(5)         |
| O3   | 64.9(9)         | 27.1(6)         | 28.9(6)         | 2.6(5)          | -17.1(6)        | 0.2(6)          |
| C1   | 25.7(7)         | 26.0(7)         | 22.1(7)         | -0.4(6)         | -3.4(6)         | -3.2(6)         |
| C2   | 28.6(8)         | 29.7(7)         | 24.6(7)         | 2.1(6)          | -1.8(6)         | -4.2(7)         |
| C4   | 39.3(9)         | 25.0(7)         | 22.8(7)         | 0.3(6)          | -2.6(6)         | -3.2(7)         |
| C5   | 24.8(7)         | 22.5(7)         | 20.0(6)         | -0.6(5)         | 1.4(6)          | -2.9(6)         |
| C6   | 28.7(8)         | 24.4(7)         | 21.3(7)         | -3.8(5)         | 1.1(6)          | -3.8(6)         |
| C7   | 24.6(7)         | 27.5(7)         | 17.4(6)         | -2.5(6)         | 0.5(6)          | -1.9(6)         |
| C8   | 20.4(7)         | 23.7(7)         | 16.8(6)         | -0.3(5)         | 0.4(5)          | -2.8(5)         |
| C9   | 18.8(6)         | 23.2(7)         | 18.6(6)         | -0.9(5)         | -0.3(6)         | -3.8(6)         |
| C10  | 22.1(7)         | 23.5(7)         | 18.2(6)         | -0.2(5)         | -0.7(6)         | -3.1(6)         |
| C11  | 27.8(8)         | 25.3(7)         | 20.1(6)         | -2.5(6)         | -1.7(6)         | -4.5(6)         |
| C12  | 25.1(7)         | 23.0(7)         | 22.3(6)         | -1.7(5)         | 1.4(6)          | -2.6(6)         |
| C13  | 20.7(7)         | 27.9(7)         | 24.8(7)         | 0.6(6)          | 1.4(6)          | -1.6(6)         |
| C14  | 22.1(7)         | 27.1(7)         | 19.1(6)         | 0.2(6)          | 0.2(6)          | -3.0(6)         |
| C15  | 24.8(7)         | 28.7(7)         | 19.7(6)         | 1.7(6)          | 1.9(6)          | -2.5(6)         |
| C16  | 23.3(7)         | 27.9(7)         | 22.4(6)         | 0.5(6)          | -2.4(6)         | -4.0(6)         |
| C17  | 45.9(10)        | 30.5(8)         | 28.3(8)         | 1.8(7)          | 1.3(8)          | -8.2(8)         |
| C18  | 43.9(10)        | 29.7(8)         | 42.4(9)         | 2.5(7)          | 0.2(8)          | 7.4(8)          |
| C19  | 53.5(11)        | 27.7(8)         | 28.9(8)         | 1.5(6)          | 4.0(8)          | -11.1(8)        |
| C20  | 25.1(8)         | 29.5(7)         | 21.3(6)         | 0.5(6)          | 2.6(6)          | -5.0(6)         |

**Table S2-4** Bond Lengths **1**.

| Atom | Atom | Length/ $\text{\AA}$ | Atom | Atom | Length/ $\text{\AA}$ |
|------|------|----------------------|------|------|----------------------|
| O1   | C2   | 1.209(2)             | C8   | C9   | 1.5538(18)           |
| O2   | C14  | 1.214(2)             | C8   | C14  | 1.523(2)             |
| O3   | C2   | 1.3374(19)           | C8   | C15  | 1.5519(19)           |
| O3   | C4   | 1.4839(19)           | C9   | C10  | 1.5558(19)           |
| C1   | C2   | 1.503(2)             | C9   | C11  | 1.558(2)             |
| C1   | C10  | 1.534(2)             | C10  | C20  | 1.538(2)             |
| C4   | C5   | 1.544(2)             | C11  | C12  | 1.537(2)             |
| C4   | C18  | 1.520(3)             | C12  | C13  | 1.536(2)             |
| C4   | C19  | 1.523(2)             | C12  | C16  | 1.511(2)             |
| C5   | C6   | 1.536(2)             | C13  | C14  | 1.519(2)             |
| C5   | C10  | 1.5461(19)           | C15  | C16  | 1.514(2)             |
| C6   | C7   | 1.524(2)             | C16  | C17  | 1.319(2)             |
| C7   | C8   | 1.5265(19)           |      |      |                      |

**Table S2-5** Bond Angles for **1**.

| Atom | Atom | Atom | Angle/°    | Atom | Atom | Atom | Angle/°    |
|------|------|------|------------|------|------|------|------------|
| C2   | O3   | C4   | 125.95(12) | C8   | C9   | C10  | 114.45(11) |
| C2   | C1   | C10  | 114.99(12) | C8   | C9   | C11  | 110.71(12) |
| O1   | C2   | O3   | 117.70(14) | C10  | C9   | C11  | 114.93(11) |
| O1   | C2   | C1   | 122.63(15) | C1   | C10  | C5   | 106.30(12) |
| O3   | C2   | C1   | 119.65(13) | C1   | C10  | C9   | 107.15(11) |
| O3   | C4   | C5   | 112.33(12) | C1   | C10  | C20  | 109.37(12) |
| O3   | C4   | C18  | 104.22(14) | C5   | C10  | C9   | 107.05(11) |
| O3   | C4   | C19  | 104.00(13) | C20  | C10  | C5   | 113.62(12) |
| C18  | C4   | C5   | 109.93(13) | C20  | C10  | C9   | 112.95(12) |
| C18  | C4   | C19  | 109.79(14) | C12  | C11  | C9   | 110.36(11) |
| C19  | C4   | C5   | 115.84(15) | C13  | C12  | C11  | 107.96(12) |
| C4   | C5   | C10  | 115.03(12) | C16  | C12  | C11  | 108.98(12) |
| C6   | C5   | C4   | 112.71(12) | C16  | C12  | C13  | 107.82(11) |
| C6   | C5   | C10  | 111.71(12) | C14  | C13  | C12  | 109.81(12) |
| C7   | C6   | C5   | 110.15(12) | O2   | C14  | C8   | 123.95(14) |
| C6   | C7   | C8   | 113.48(11) | O2   | C14  | C13  | 122.78(14) |
| C7   | C8   | C9   | 111.99(12) | C13  | C14  | C8   | 113.17(13) |
| C7   | C8   | C15  | 109.85(11) | C16  | C15  | C8   | 111.40(12) |
| C14  | C8   | C7   | 113.62(12) | C12  | C16  | C15  | 111.86(12) |
| C14  | C8   | C9   | 110.62(11) | C17  | C16  | C12  | 124.49(14) |
| C14  | C8   | C15  | 103.89(12) | C17  | C16  | C15  | 123.62(14) |
| C15  | C8   | C9   | 106.32(11) |      |      |      |            |

**Table S2-6** Torsion Angles for **1**.

| A  | B  | C   | D   | Angle/°     | A   | B   | C   | D   | Angle/°     |
|----|----|-----|-----|-------------|-----|-----|-----|-----|-------------|
| O3 | C4 | C5  | C6  | -164.40(13) | C9  | C8  | C14 | O2  | -131.74(15) |
| O3 | C4 | C5  | C10 | -34.8(2)    | C9  | C8  | C14 | C13 | 51.80(16)   |
| C2 | O3 | C4  | C5  | 6.6(2)      | C9  | C8  | C15 | C16 | -58.74(15)  |
| C2 | O3 | C4  | C18 | 125.55(18)  | C9  | C11 | C12 | C13 | 60.28(15)   |
| C2 | O3 | C4  | C19 | -119.42(18) | C9  | C11 | C12 | C16 | -56.58(15)  |
| C2 | C1 | C10 | C5  | -51.10(17)  | C10 | C1  | C2  | O1  | -154.86(16) |
| C2 | C1 | C10 | C9  | -165.31(13) | C10 | C1  | C2  | O3  | 26.9(2)     |
| C2 | C1 | C10 | C20 | 71.95(17)   | C10 | C5  | C6  | C7  | 61.05(16)   |
| C4 | O3 | C2  | O1  | 178.96(17)  | C10 | C9  | C11 | C12 | -134.16(13) |
| C4 | O3 | C2  | C1  | -2.7(3)     | C11 | C9  | C10 | C1  | -62.61(16)  |
| C4 | C5 | C6  | C7  | -167.63(13) | C11 | C9  | C10 | C5  | -176.31(12) |
| C4 | C5 | C10 | C1  | 55.89(17)   | C11 | C9  | C10 | C20 | 57.89(16)   |
| C4 | C5 | C10 | C9  | 170.16(12)  | C11 | C12 | C13 | C14 | -62.67(14)  |
| C4 | C5 | C10 | C20 | -64.44(17)  | C11 | C12 | C16 | C15 | 58.25(16)   |
| C5 | C6 | C7  | C8  | -54.14(17)  | C11 | C12 | C16 | C17 | -123.70(17) |
| C6 | C5 | C10 | C1  | -173.99(12) | C12 | C13 | C14 | O2  | -170.48(14) |
| C6 | C5 | C10 | C9  | -59.72(15)  | C12 | C13 | C14 | C8  | 6.02(16)    |

| A  | B   | C   | D   | Angle/°     | A   | B   | C   | D   | Angle/°     |
|----|-----|-----|-----|-------------|-----|-----|-----|-----|-------------|
| C6 | C5  | C10 | C20 | 65.68(15)   | C13 | C12 | C16 | C15 | -58.70(16)  |
| C6 | C7  | C8  | C9  | 48.13(16)   | C13 | C12 | C16 | C17 | 119.36(18)  |
| C6 | C7  | C8  | C14 | -78.10(16)  | C14 | C8  | C9  | C10 | 78.73(15)   |
| C6 | C7  | C8  | C15 | 166.03(13)  | C14 | C8  | C9  | C11 | -53.10(16)  |
| C7 | C8  | C9  | C10 | -49.12(16)  | C14 | C8  | C15 | C16 | 58.02(15)   |
| C7 | C8  | C9  | C11 | 179.06(12)  | C15 | C8  | C9  | C10 | -169.10(12) |
| C7 | C8  | C14 | O2  | -4.8(2)     | C15 | C8  | C9  | C11 | 59.07(14)   |
| C7 | C8  | C14 | C13 | 178.75(11)  | C15 | C8  | C14 | O2  | 114.54(16)  |
| C7 | C8  | C15 | C16 | 179.89(13)  | C15 | C8  | C14 | C13 | -61.92(14)  |
| C8 | C9  | C10 | C1  | 167.62(12)  | C16 | C12 | C13 | C14 | 54.94(15)   |
| C8 | C9  | C10 | C5  | 53.93(16)   | C18 | C4  | C5  | C6  | 80.05(17)   |
| C8 | C9  | C10 | C20 | -71.88(15)  | C18 | C4  | C5  | C10 | -150.32(14) |
| C8 | C9  | C11 | C12 | -2.58(16)   | C19 | C4  | C5  | C6  | -45.10(18)  |
| C8 | C15 | C16 | C12 | 0.59(18)    | C19 | C4  | C5  | C10 | 84.54(16)   |
| C8 | C15 | C16 | C17 | -177.49(16) |     |     |     |     |             |

**Table S2-7** Hydrogen Atom Coordinates ( $\text{\AA}\times 10^4$ ) and Isotropic Displacement Parameters ( $\text{\AA}^2\times 10^3$ ) for **1**.

| Atom | x        | y        | z       | U(eq) |
|------|----------|----------|---------|-------|
| H1A  | 9487.28  | 4052.43  | 6921.78 | 30    |
| H1B  | 7669.13  | 4353.86  | 7345.81 | 30    |
| H5   | 8684.68  | 2630.91  | 6146.09 | 27    |
| H6A  | 6357.46  | 1417.35  | 5585.7  | 30    |
| H6B  | 4390.89  | 1985.76  | 5907.1  | 30    |
| H7A  | 4884.52  | 3198.61  | 5118.62 | 28    |
| H7B  | 7308.77  | 3416.59  | 5261.66 | 28    |
| H9   | 8064.58  | 4808.97  | 6156.86 | 24    |
| H11A | 5309.67  | 5810.87  | 6907.84 | 29    |
| H11B | 7243.53  | 6490.59  | 6614.96 | 29    |
| H12  | 4020.24  | 7569.77  | 6373.7  | 28    |
| H13A | 1737.93  | 5729.52  | 6475.06 | 29    |
| H13B | 1283.86  | 6421.82  | 5914.37 | 29    |
| H15A | 7446.22  | 5706.94  | 5281.19 | 29    |
| H15B | 5163.62  | 5678.24  | 5008.82 | 29    |
| H17A | 6340(40) | 8180(20) | 5052(9) | 43(6) |
| H17B | 5210(40) | 8900(20) | 5608(9) | 46(6) |
| H18A | 10731.14 | 878.82   | 6300.2  | 58    |
| H18B | 8983.11  | 95.58    | 5982.47 | 58    |
| H18C | 9796.71  | -375.77  | 6557.08 | 58    |
| H19A | 6206.33  | -470.57  | 6911.89 | 55    |
| H19B | 5120.83  | 61.04    | 6377.88 | 55    |
| H19C | 4742.46  | 744.44   | 6942.5  | 55    |
| H20A | 3770     | 4089.59  | 7054.37 | 38    |



| Atom | x       | y       | z       | U(eq) |
|------|---------|---------|---------|-------|
| H20B | 4438.05 | 2689.23 | 7203.59 | 38    |
| H20C | 3311.97 | 2975.04 | 6641.01 | 38    |

### S3. Calculation of ECD Spectra for 1.

In general, conformational analyses were carried out via random searching in the Sybyl-X 2.0 using the MMFF94S force field with an energy cutoff of 2.5 kcal/mol (Sybyl Software, 2013). The results showed two lowest energy conformer for both compounds. Subsequently, the conformers were re-optimized using DFT at the PBE0-D3(BJ)/def2-SVP level in MeOH using the polarizable conductor calculation model (SMD) by the ORCA4.2.1 program (Stephens and Harada, 2010; Neese, 2012). The energies, oscillator strengths, and rotational strengths (velocity) of the first 100 electronic excitations were calculated using the TDDFT methodology at the DSD-PBEP86/def2-TZVP level in MeOH. The ECD spectra were simulated by the overlapping Gaussian function (half the bandwidth at 1/e peak height, sigma = 0.30 for all) (Neese, 2017). To get the final spectra, the simulated spectra of the conformers were averaged according to the Boltzmann distribution theory and their relative Gibbs free energy ( $\Delta G$ ). By comparing the experiment spectra with the calculated model molecules, the absolute configuration of the only chiral center was determined to be.

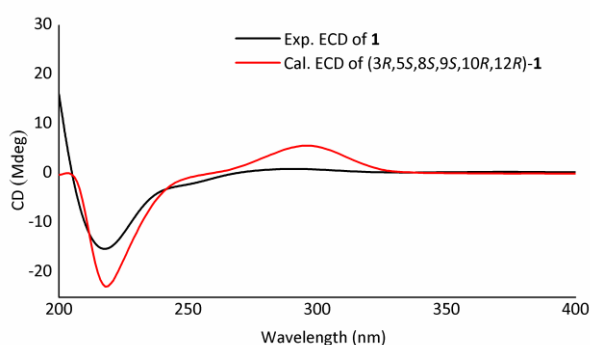

**Figure S3.** Experimental and calculated ECD spectra of **1** in MeOH.

**Table S3.** Energy Analysis for the Conformers of **1**.

| Conformers | $\Delta G$ | P(%) / 100 | Single point energy(a.u.) |
|------------|------------|------------|---------------------------|
| 1-1_tddft_ | 0.00000    | 52.27      | -1041.8189217343          |
| 1-2_tddft_ | 0.00009    | 47.73      | -1041.8188361719          |

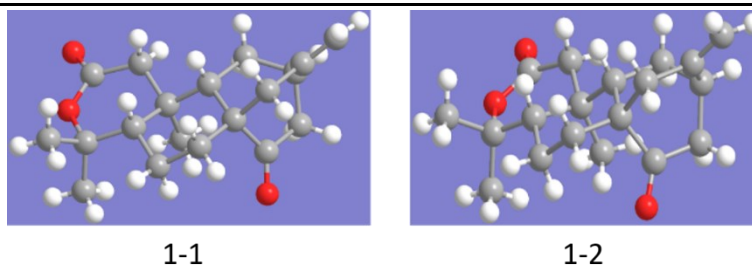

**Figure S3.** B3lyp/6-311g\*\*/20 optimized low-energy conformers of **1**.

### S4. Calculation of ECD Spectra for 2.

In general, conformational analyses were carried out via random searching in the Sybyl-X 2.0 using the MMFF94S force field with an energy cutoff of 2.5 kcal/mol (Sybyl Software, 2013). The results showed six lowest energy conformer for both compounds. Subsequently, the conformers were re-optimized using DFT at the PBE0-D3(BJ)/def2-SVP level in MeOH using the polarizable conductor calculation model (SMD) by the ORCA4.2.1 program (Stephens and Harada, 2010; Neese, 2012). The energies, oscillator strengths, and rotational strengths (velocity) of the first 30 electronic excitations were calculated using the TDDFT methodology at the PBE0-D3(BJ)/def2-TZVP level in MeOH. The ECD spectra were simulated by the overlapping Gaussian function (half the bandwidth at 1/e peak height, sigma = 0.30 for all) (Neese, 2017). To get the final spectra, the simulated spectra of the conformers were averaged according to the Boltzmann distribution theory and their relative Gibbs free energy ( $\Delta G$ ). By comparing the experiment spectra with the calculated model molecules, the absolute configuration of the only chiral center was determined to be.

**Table S4.** Energy Analysis for the Conformers of **2**.

| Conformers | $\Delta G$ | P(%) / 100 | Single point energy(a.u.) |
|------------|------------|------------|---------------------------|
| 2-1_tddft_ | 0.00000    | 42.41      | -1005.1598274396          |
| 2-2_tddft_ | 0.00005    | 40.29      | -1005.1597789402          |
| 2-3_tddft_ | 0.00085    | 17.3       | -1005.1589813893          |
| 2-4_tddft_ | 0.01250    | 0.0        | -1005.1473287906          |
| 2-5_tddft_ | 0.01345    | 0.0        | -1005.1463754076          |
| 2-6_tddft_ | 0.01327    | 0.0        | -1005.1465567074          |

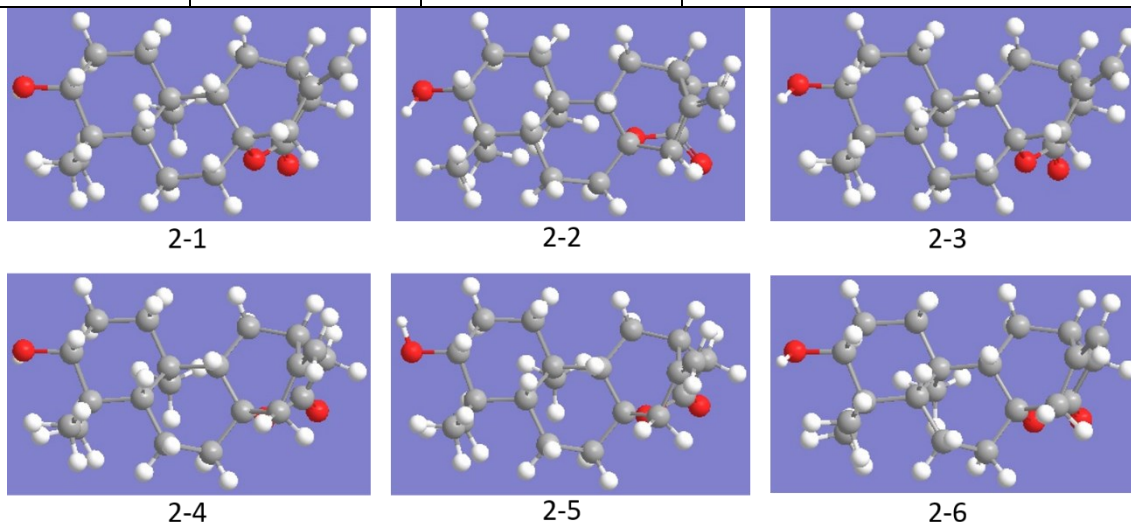

**Figure S4.** B3lyp/6-311g\*\*/20 optimized low-energy conformers of **2**.

#### S5. IC<sub>50</sub> Data of compound **1**

**Table S5-1.** The residual activity of acetylcholinesterase was incubated with different concentrations of **1** in an *in vitro* activity screening model ( $\bar{x} \pm s$ , n = 3).

|   |       | X             | Group A             | Group B             | Group C             | Group D |
|---|-------|---------------|---------------------|---------------------|---------------------|---------|
|   |       | concentration | residual activity-A | residual activity-B | residual activity-C | Title   |
|   |       | X             | Y                   | Y                   | Y                   | Y       |
| 1 | Title | 0.5           | 92.49012            | 93.84010            | 92.40838            |         |
| 2 | Title | 1.0           | 73.51779            | 67.62779            | 72.90576            |         |
| 3 | Title | 2.0           | 41.63373            | 48.36173            | 45.68063            |         |
| 4 | Title | 4.0           | 30.83004            | 32.89646            | 34.55497            |         |
| 5 | Title | 6.0           | 23.58366            | 21.23198            | 24.21466            |         |
| 6 | Title | 8.0           | 16.86430            | 16.38270            | 16.75393            |         |
| 7 | Title | 10.0          | 14.75626            | 14.80996            | 15.31414            |         |
| 8 | Title |               |                     |                     |                     |         |
| 9 | Title |               |                     |                     |                     |         |

**Table S5-2.** Transform X of Table S11-2 ( $\bar{X} \pm s, n = 3$ ).

|   |  | X             | A                   | B                   | C                   |
|---|--|---------------|---------------------|---------------------|---------------------|
|   |  | concentration | residual activity-A | residual activity-B | residual activity-C |
|   |  | X             |                     |                     |                     |
| 1 |  | -0.301        | 92.490              | 93.840              | 92.408              |
| 2 |  | 0.000         | 73.518              | 67.628              | 72.906              |
| 3 |  | 0.301         | 41.634              | 48.362              | 45.681              |
| 4 |  | 0.602         | 30.830              | 32.896              | 34.555              |
| 5 |  | 0.778         | 23.584              | 21.232              | 24.215              |
| 6 |  | 0.903         | 16.864              | 16.383              | 16.754              |
| 7 |  | 1.000         | 14.756              | 14.810              | 15.314              |
| 8 |  |               |                     |                     |                     |

**Table S5-3.** The calculation interface of IC<sub>50</sub> value of compound 1.

| Nonlin fit<br>Table of results |                                                                 | A                   | B                   | C                   |
|--------------------------------|-----------------------------------------------------------------|---------------------|---------------------|---------------------|
|                                |                                                                 | residual activity-A | residual activity-B | residual activity-C |
| 1                              | <b>log(inhibitor) vs. normalized response -- Variable slope</b> |                     |                     |                     |
| 2                              | <b>Best-fit values</b>                                          |                     |                     |                     |
| 3                              | LogIC50                                                         | 0.3153              | 0.3246              | 0.3426              |
| 4                              | HillSlope                                                       | -1.269              | -1.251              | -1.239              |
| 5                              | IC50                                                            | 2.067               | 2.112               | 2.201               |
| 6                              | <b>95% CI (profile likelihood)</b>                              |                     |                     |                     |
| 7                              | LogIC50                                                         | 0.2050 to 0.4201    | 0.2352 to 0.4098    | 0.2526 to 0.4284    |
| 8                              | HillSlope                                                       | -1.694 to -0.9445   | -1.571 to -0.9905   | -1.559 to -0.9775   |
| 9                              | IC50                                                            | 1.603 to 2.631      | 1.719 to 2.569      | 1.789 to 2.681      |
| 10                             | <b>Goodness of Fit</b>                                          |                     |                     |                     |
| 11                             | Degrees of Freedom                                              | 5                   | 5                   | 5                   |
| 12                             | R squared                                                       | 0.9708              | 0.9808              | 0.9802              |
| 13                             | Sum of Squares                                                  | 157.3               | 101.7               | 103.5               |
| 14                             | Sy.x                                                            | 5.609               | 4.510               | 4.550               |
| 15                             |                                                                 |                     |                     |                     |
| 16                             | <b>Number of points</b>                                         |                     |                     |                     |
| 17                             | # of X values                                                   | 7                   | 7                   | 7                   |
| 18                             | # Y values analyzed                                             | 7                   | 7                   | 7                   |

### S6. Inhibition kinetic data of compound 1

**Table S6-1.** Inhibition kinetics of ELA towards AChE ( $\bar{x} \pm s, n = 3$ ).

| Table format: |       | X                          | Group A   | Group B     | Group C     | Group D     | Group E   | Group F   |
|---------------|-------|----------------------------|-----------|-------------|-------------|-------------|-----------|-----------|
| XY            |       | concentration of substrate | 0 $\mu$ M | 0.5 $\mu$ M | 1.0 $\mu$ M | 2.0 $\mu$ M | 4 $\mu$ M | 6 $\mu$ M |
|               | x     | X                          | Y         | Y           | Y           | Y           | Y         | Y         |
| 1             | Title | 0.1                        | 0.680000  | 0.634000    | 0.474000    | 0.284000    | 0.209000  | 0.134000  |
| 2             | Title | 0.2                        | 1.016000  | 0.944000    | 0.738000    | 0.508000    | 0.382000  | 0.256000  |
| 3             | Title | 0.4                        | 1.360000  | 1.242000    | 1.054000    | 0.808000    | 0.645000  | 0.482000  |
| 4             | Title | 0.6                        | 1.532000  | 1.394000    | 1.226000    | 0.986000    | 0.819000  | 0.652000  |
| 5             | Title | 0.8                        | 1.628000  | 1.472000    | 1.333200    | 1.128000    | 0.965000  | 0.802000  |
| 6             | Title | 1.0                        | 1.696000  | 1.522000    | 1.382000    | 1.198000    | 1.043000  | 0.888000  |
| 7             | Title | 1.2                        | 1.740000  | 1.556000    | 1.429200    | 1.242800    | 1.091400  | 0.940000  |

**Table S6-2.** The analysis results of inhibition kinetic data  $K_m$  and  $V_{max}$  of compound 1.

| Nonlin fit |                          | A                | B                | C                | D                | E                | F               |
|------------|--------------------------|------------------|------------------|------------------|------------------|------------------|-----------------|
|            |                          | 0 $\mu$ M        | 0.5 $\mu$ M      | 1.0 $\mu$ M      | 2.0 $\mu$ M      | 4 $\mu$ M        | 6 $\mu$ M       |
|            |                          | Y                | Y                | Y                | Y                | Y                | Y               |
| 1          | Michaelis-Menten         |                  |                  |                  |                  |                  |                 |
| 2          | Best-fit values          |                  |                  |                  |                  |                  |                 |
| 3          | Vmax                     | 2.033            | 1.802            | 1.768            | 1.783            | 1.756            | 1.924           |
| 4          | Km                       | 0.1988           | 0.1814           | 0.2724           | 0.4908           | 0.6926           | 1.190           |
| 5          | Std. Error               |                  |                  |                  |                  |                  |                 |
| 6          | Vmax                     | 0.004029         | 0.008078         | 0.01640          | 0.04341          | 0.06034          | 0.1522          |
| 7          | Km                       | 0.001447         | 0.003117         | 0.008024         | 0.02902          | 0.04977          | 0.1594          |
| 8          | 95% Confidence Intervals |                  |                  |                  |                  |                  |                 |
| 9          | Vmax                     | 2.023 to 2.043   | 1.781 to 1.822   | 1.725 to 1.810   | 1.672 to 1.895   | 1.601 to 1.912   | 1.533 to 2.315  |
| 10         | Km                       | 0.1951 to 0.2026 | 0.1734 to 0.1894 | 0.2517 to 0.2930 | 0.4162 to 0.5654 | 0.5646 to 0.8206 | 0.7797 to 1.599 |
| 11         | Goodness of Fit          |                  |                  |                  |                  |                  |                 |
| 12         | Degrees of Freedom       | 5                | 5                | 5                | 5                | 5                | 5               |
| 13         | R square                 | 0.9999           | 0.9996           | 0.9992           | 0.9981           | 0.9980           | 0.9961          |
| 14         | Absolute Sum of Squares  | 5.780e-005       | 0.0002605        | 0.0006143        | 0.001509         | 0.001390         | 0.002299        |
| 15         | Sy.x                     | 0.003400         | 0.007218         | 0.01108          | 0.01737          | 0.01667          | 0.02144         |
| 16         | Constraints              |                  |                  |                  |                  |                  |                 |
| 17         | Km                       | Km > 0.0         | Km > 0.0        |
| 18         |                          |                  |                  |                  |                  |                  |                 |
| 19         | Number of points         |                  |                  |                  |                  |                  |                 |
| 20         | Analyzed                 | 7                | 7                | 7                | 7                | 7                | 7               |

## S7. Spectroscopic data

### +MS, 0.2min #25

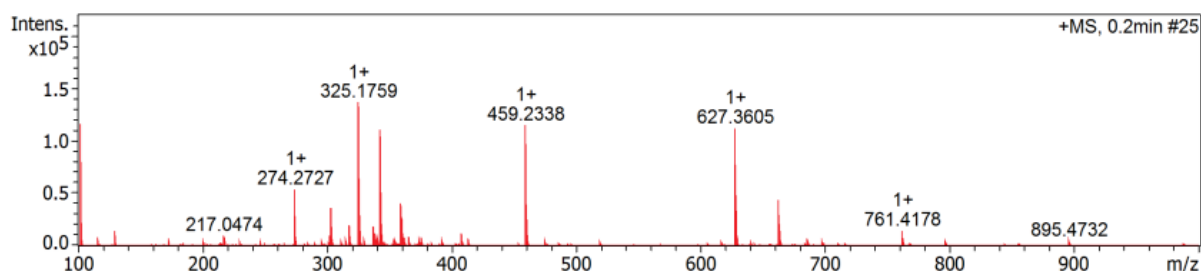

### C<sub>19</sub>H<sub>26</sub>O<sub>3</sub>, M+nNa, 325.1774

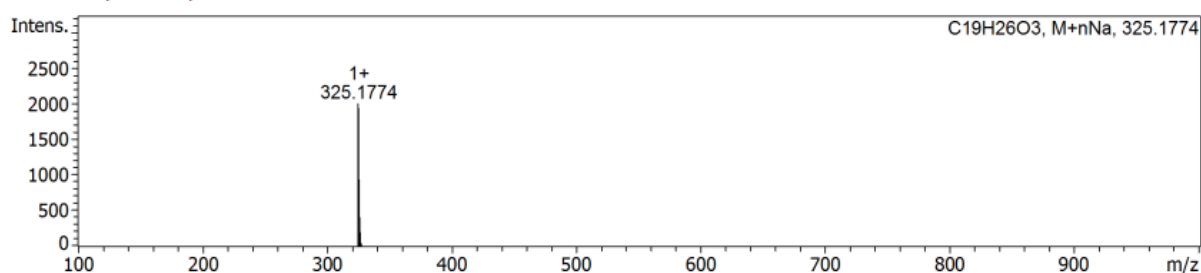

Figure S7-1. The HR-ESIMS Spectrum of compound 1

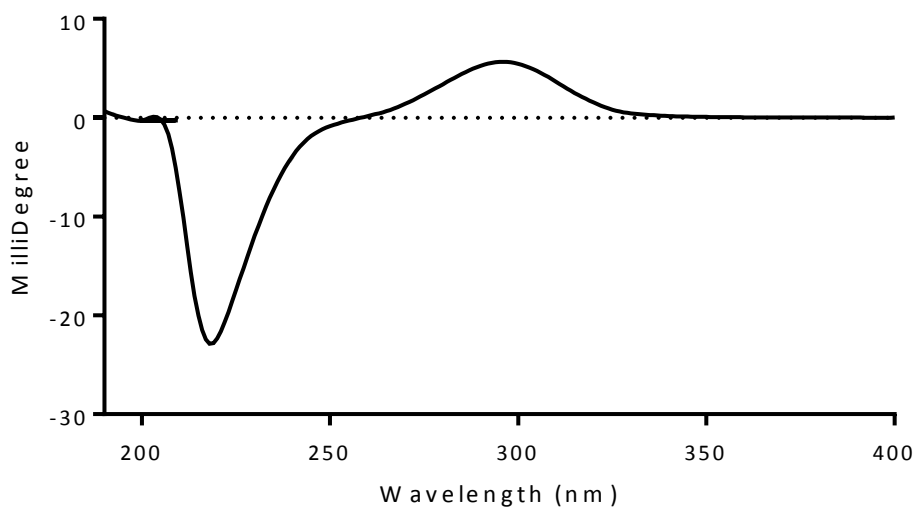

Figure S7-2. CD Spectra of compound 1

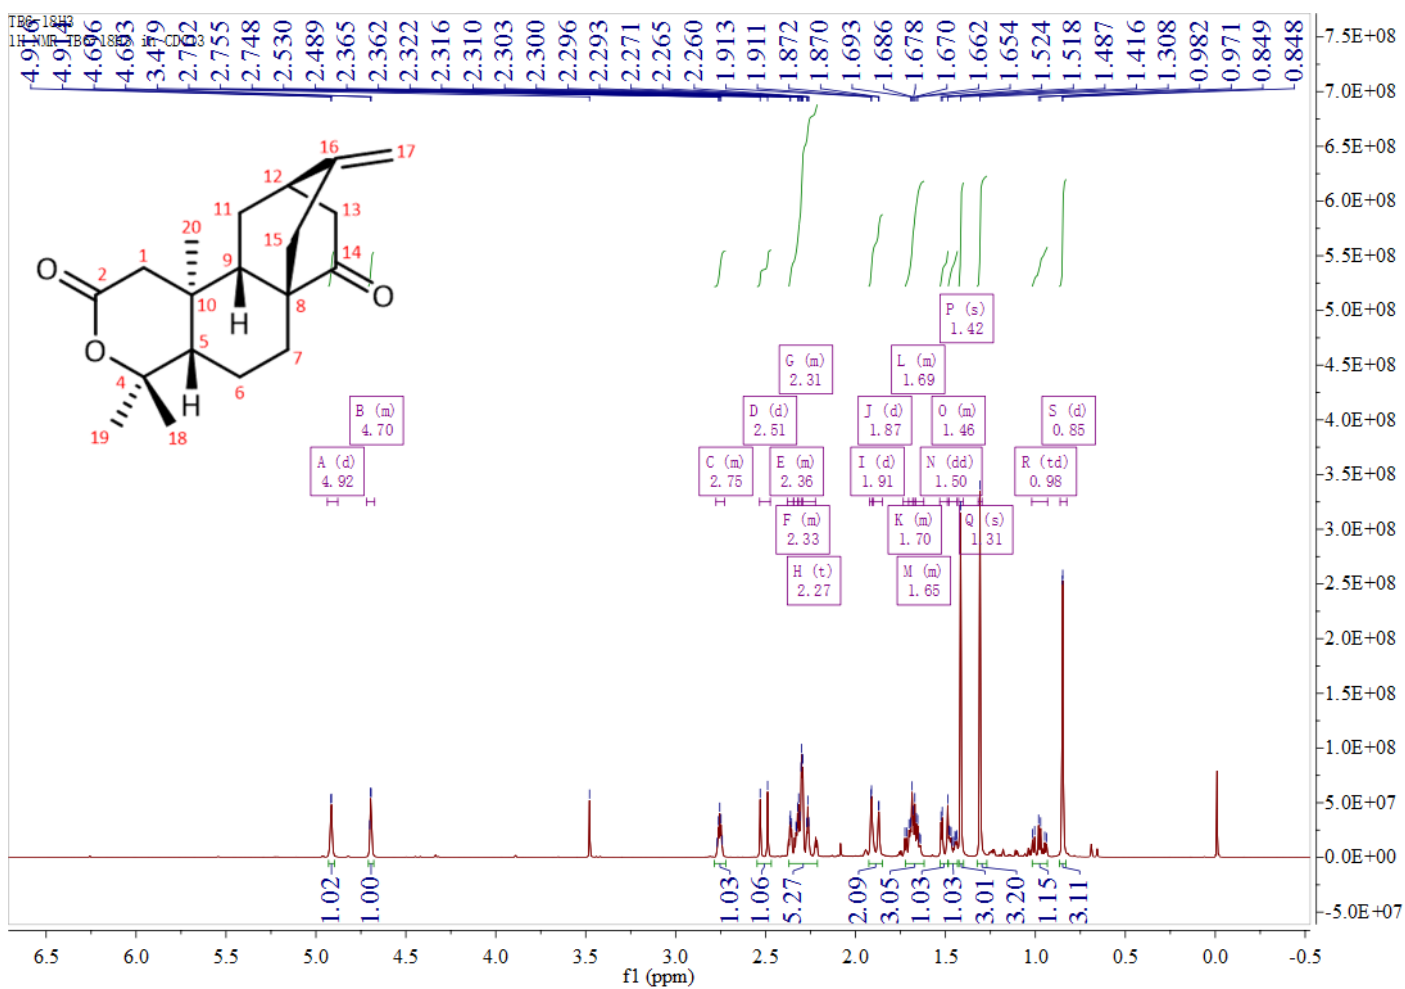

Figure S7-3. The  $^1\text{H}$ -NMR Spectrum of compound 1 in  $\text{CDCl}_3$  (400MHz)

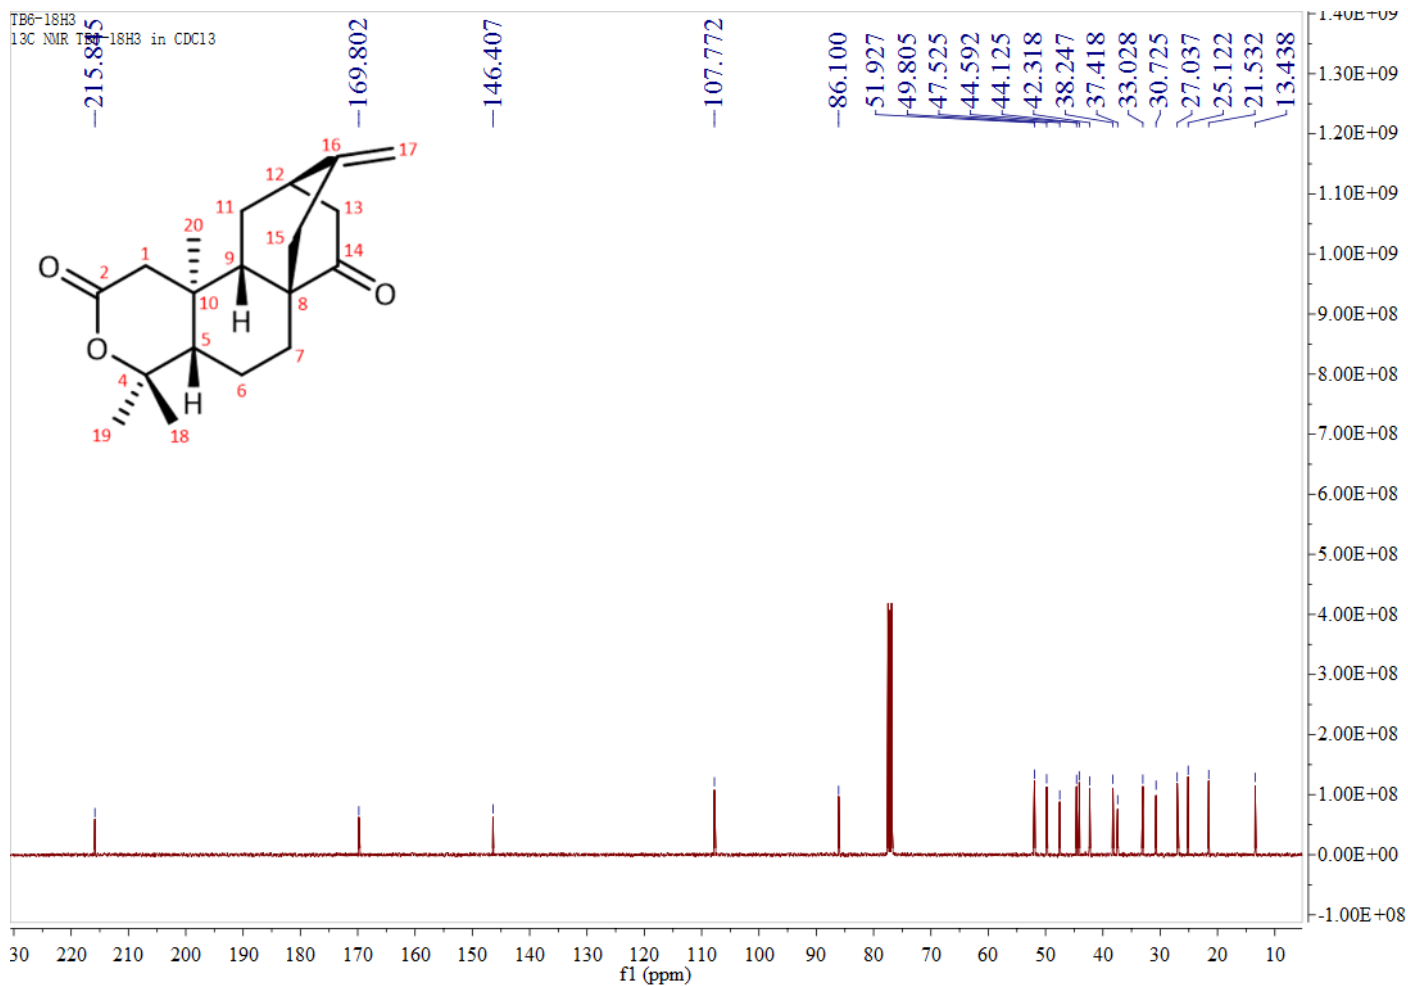

**Figure S7-4.** The <sup>13</sup>C-NMR Spectrum of compound **1** in CDCl<sub>3</sub> (100MHz)

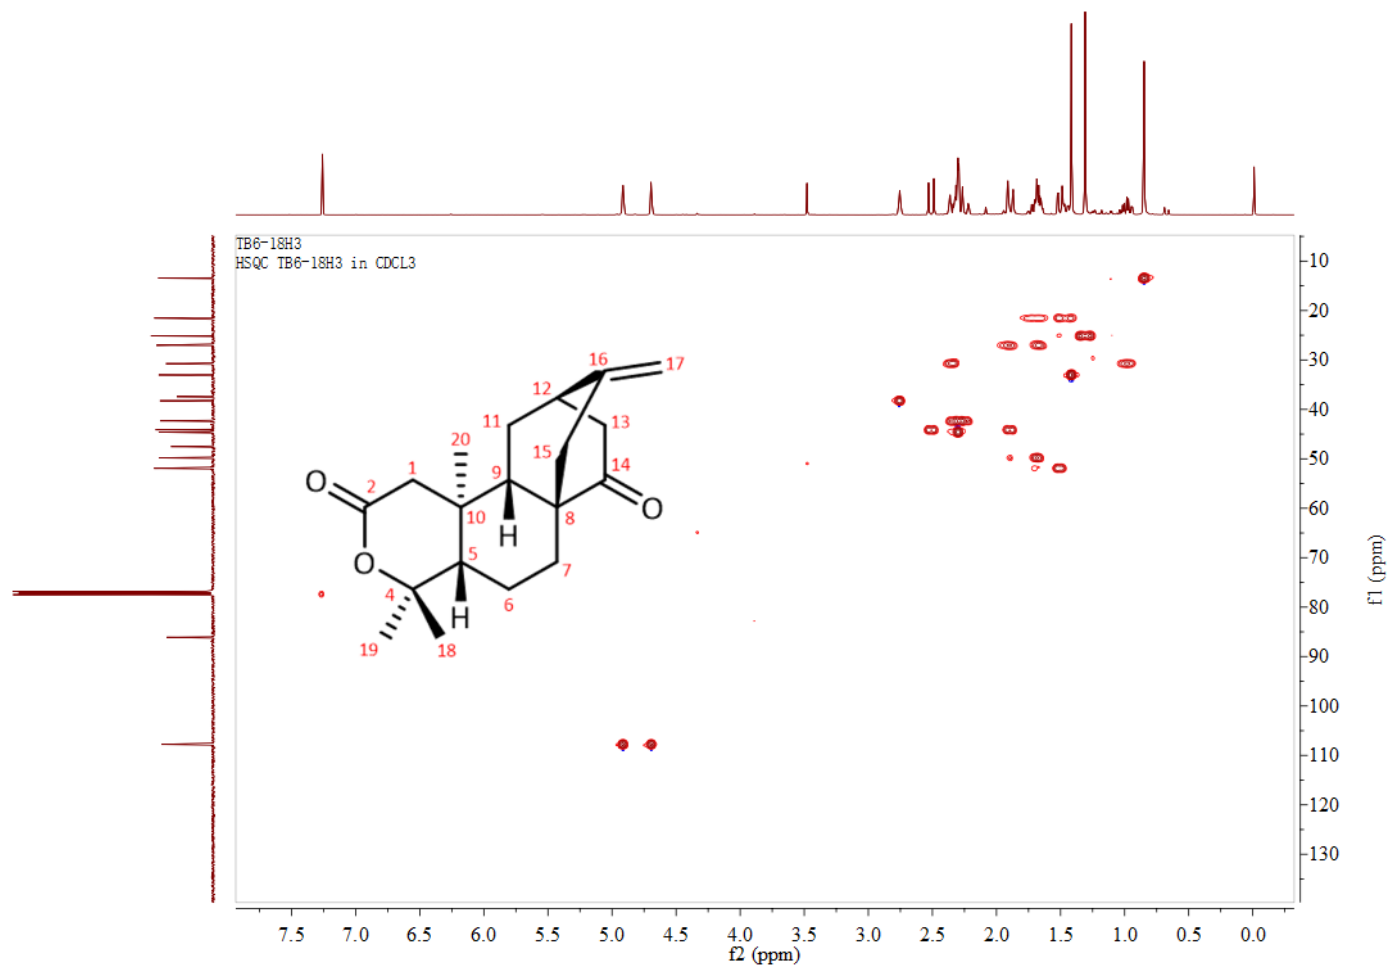

**Figure S7-5.** The HSQC Spectrum of compound **1** in CDCl<sub>3</sub> (400MHz)



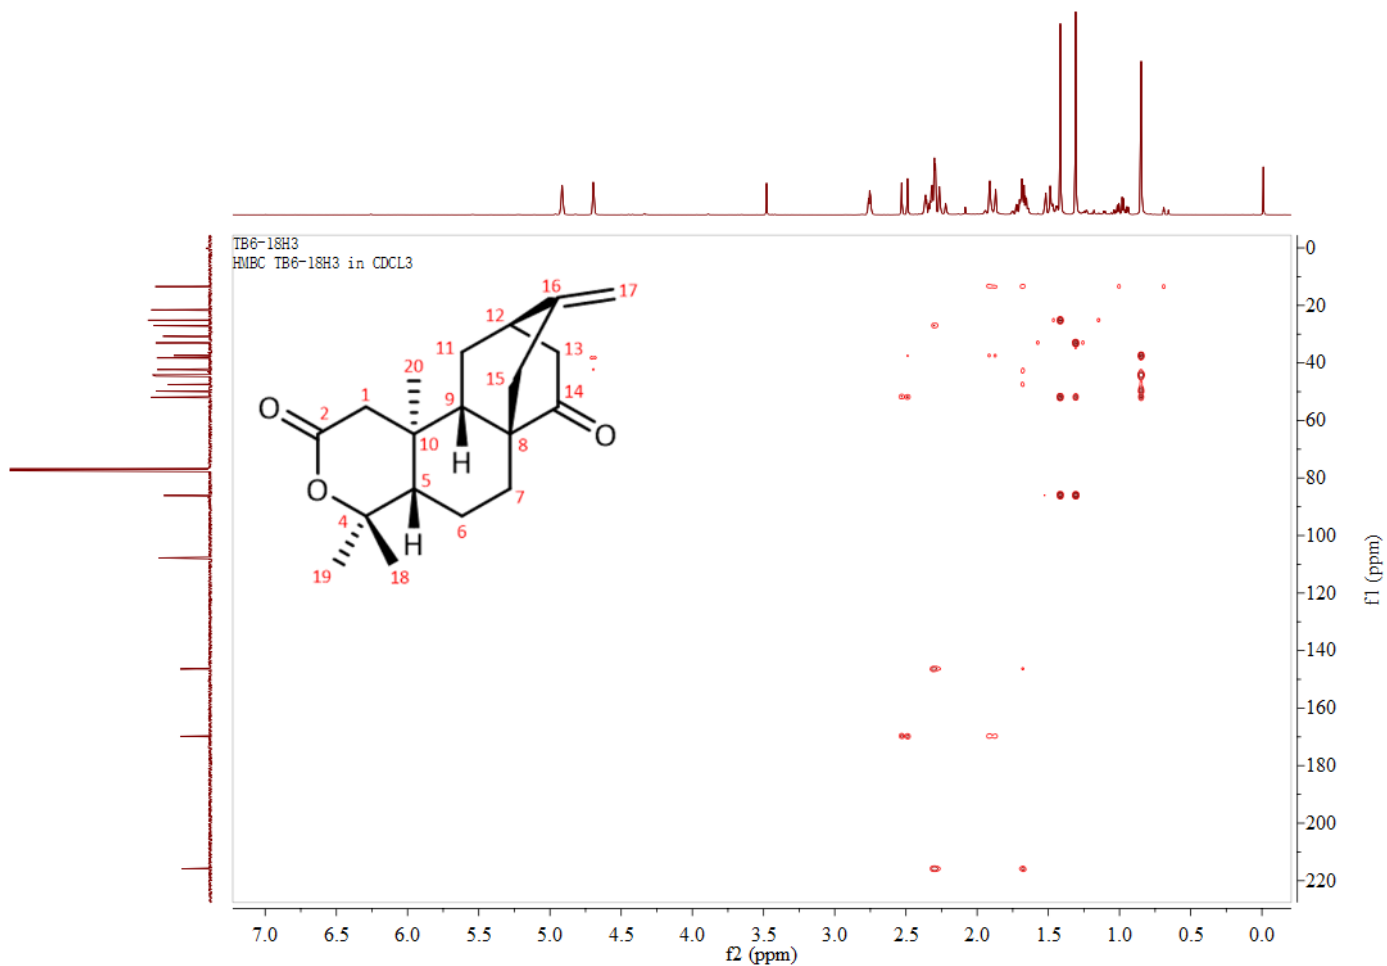

Figure S7-6. The HMBC Spectrum of compound **1** in CDCl<sub>3</sub> (400MHz)

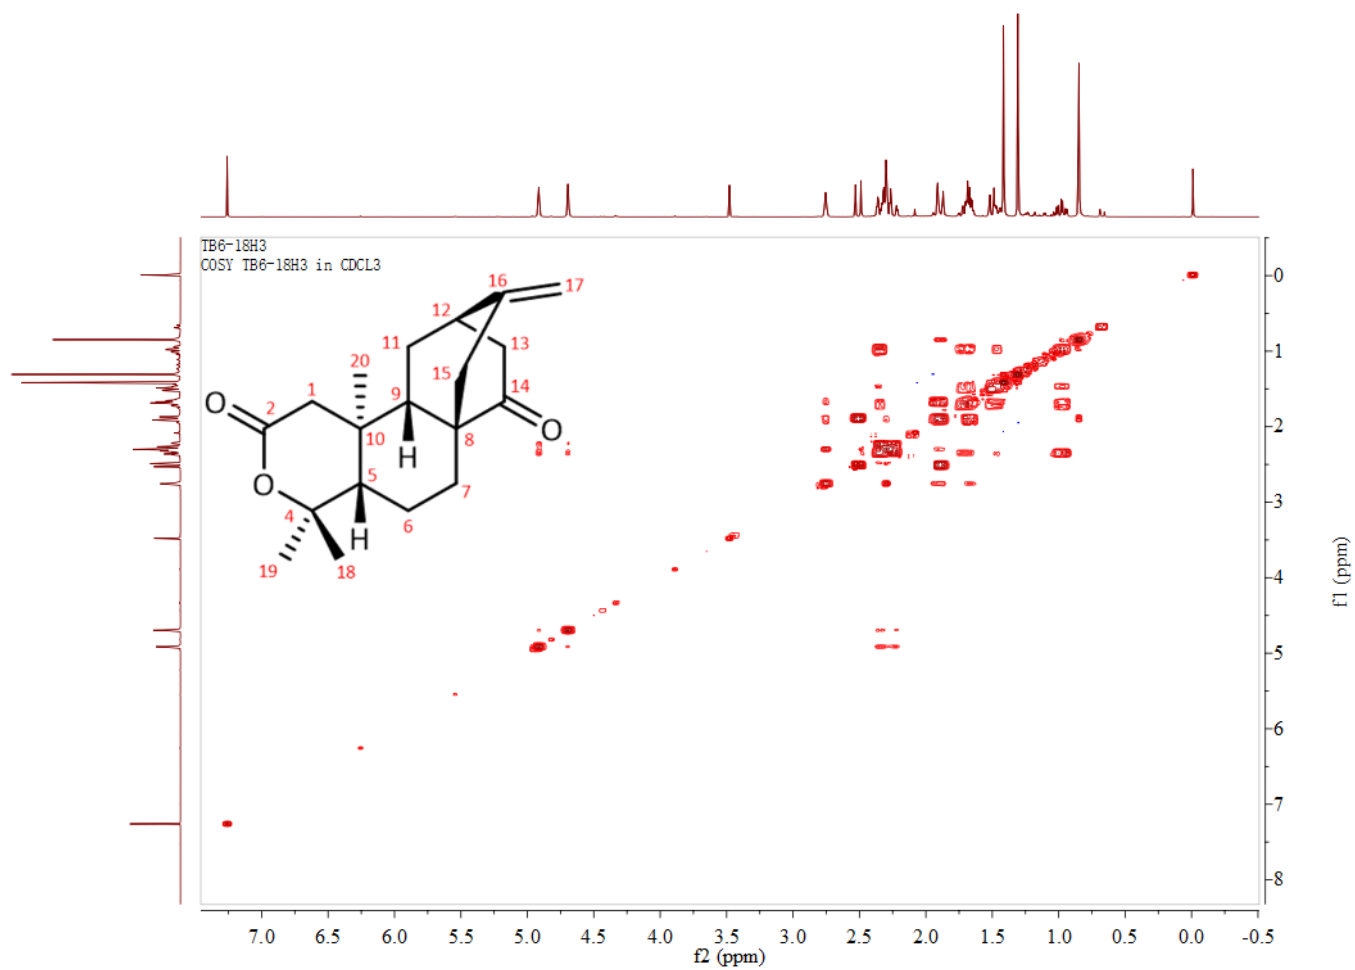

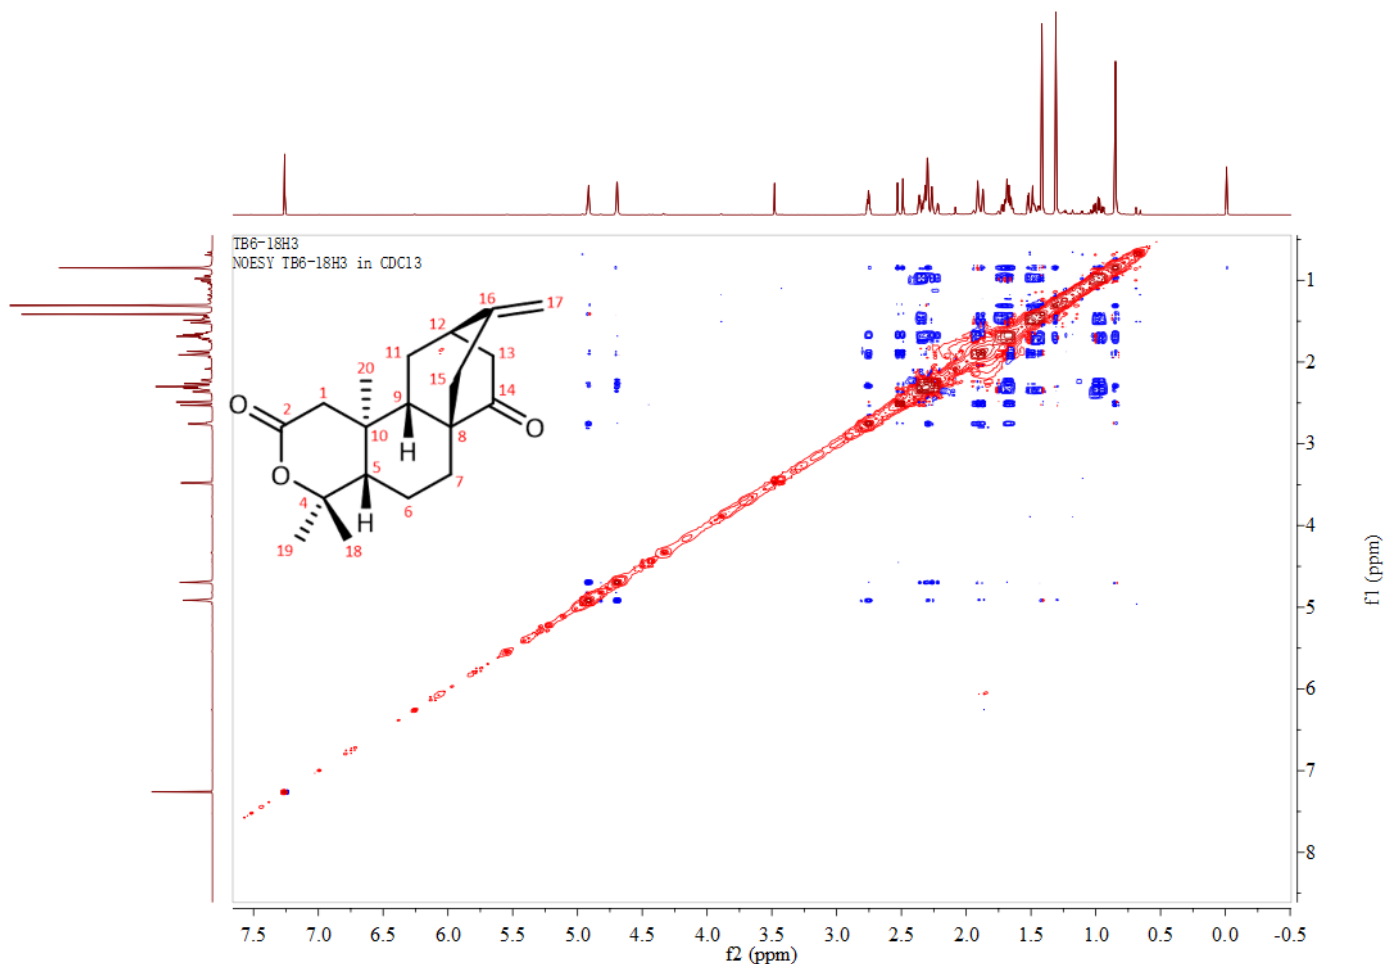

Figure S7-8. The NOESY Spectrum of compound 1 in CDCl<sub>3</sub> (400MHz)

### Qualitative Analysis Report

|                        |                             |               |                     |
|------------------------|-----------------------------|---------------|---------------------|
| Data Filename          | SY-TB3.d                    | Sample Name   | SY-TB3              |
| Sample Type            | Sample                      | Position      | P1-B3               |
| Instrument Name        | Instrument 1                | User Name     |                     |
| Acq Method             | s.m                         | Acquired Time | 9/8/2020 1:44:51 PM |
| IRM Calibration Status | Success                     | DA Method     | Default.m           |
| Comment                |                             |               |                     |
| Sample Group           |                             | Info.         |                     |
| Acquisition SW         | 6200 series TOF/6500 series |               |                     |
| Version                | Q-TOF B.05.01 (B5125.2)     |               |                     |

### User Spectra

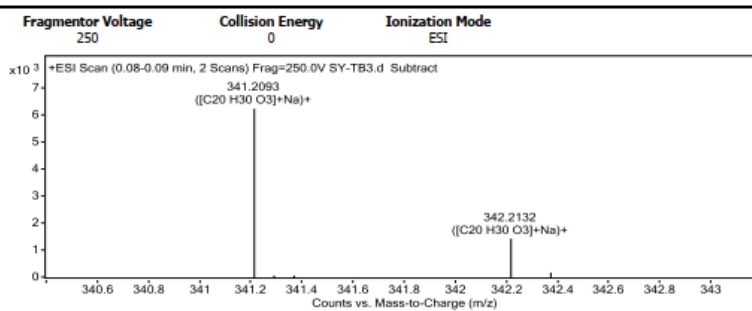

Figure S7-9. The HR-ESIMS Spectrum of compound 2

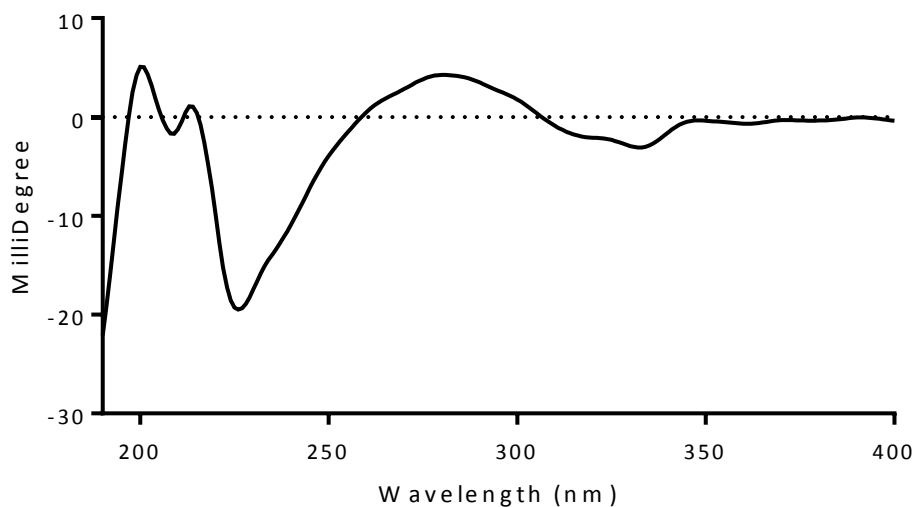

Figure S7-10. CD Spectra of compound 2

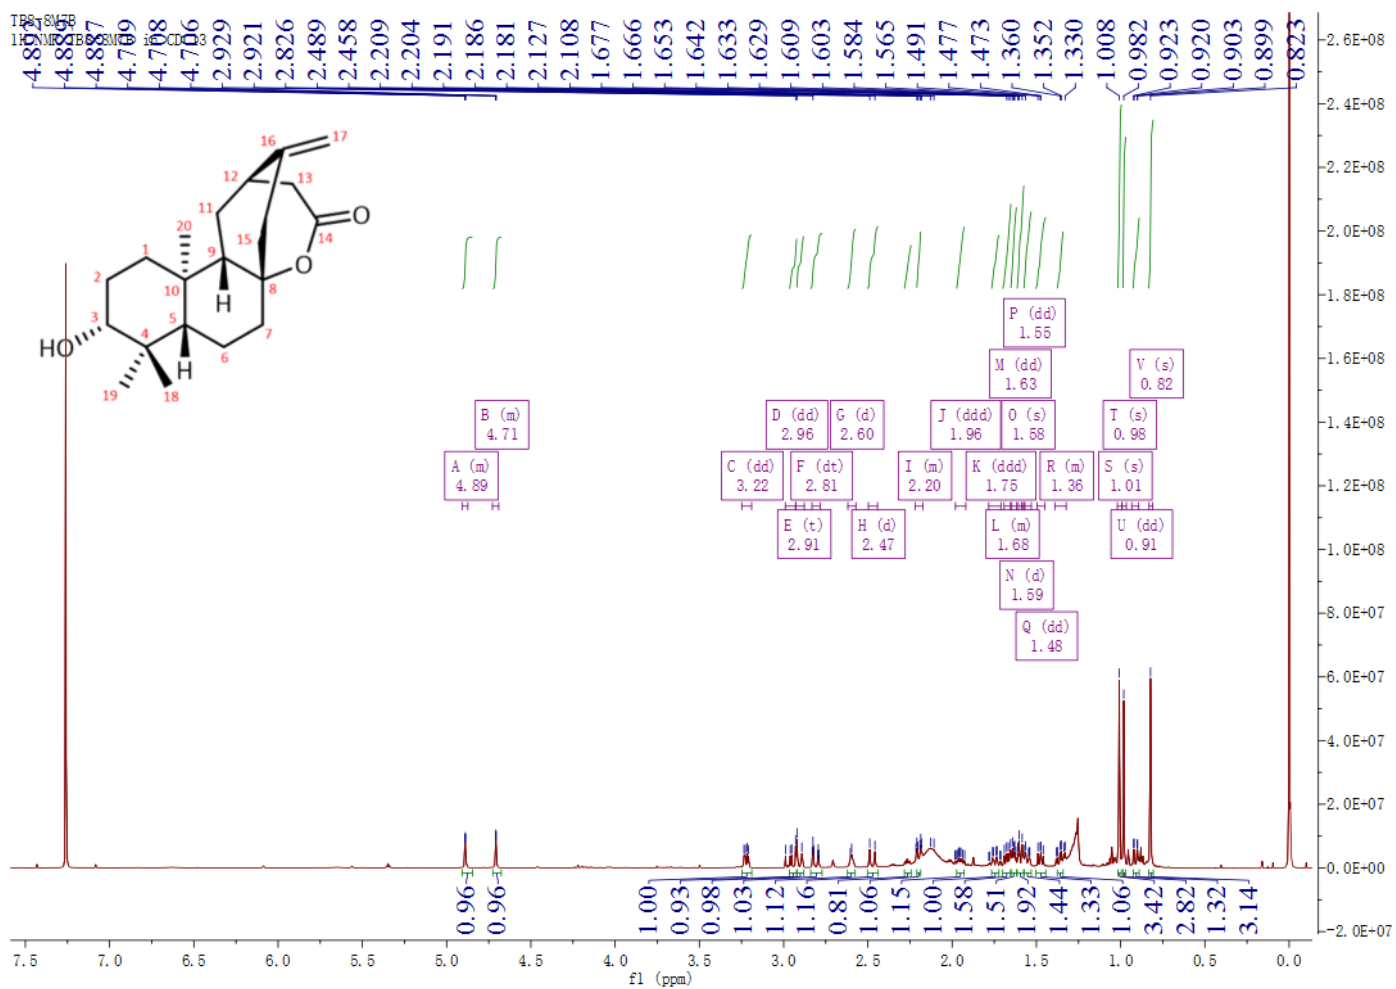

Figure S7-11. The  $^1\text{H-NMR}$  Spectrum of compound 2 in  $\text{CDCl}_3$  (600MHz)

TB8-8M7B  
13C NMR TB8-8M7B in CDCl<sub>3</sub>

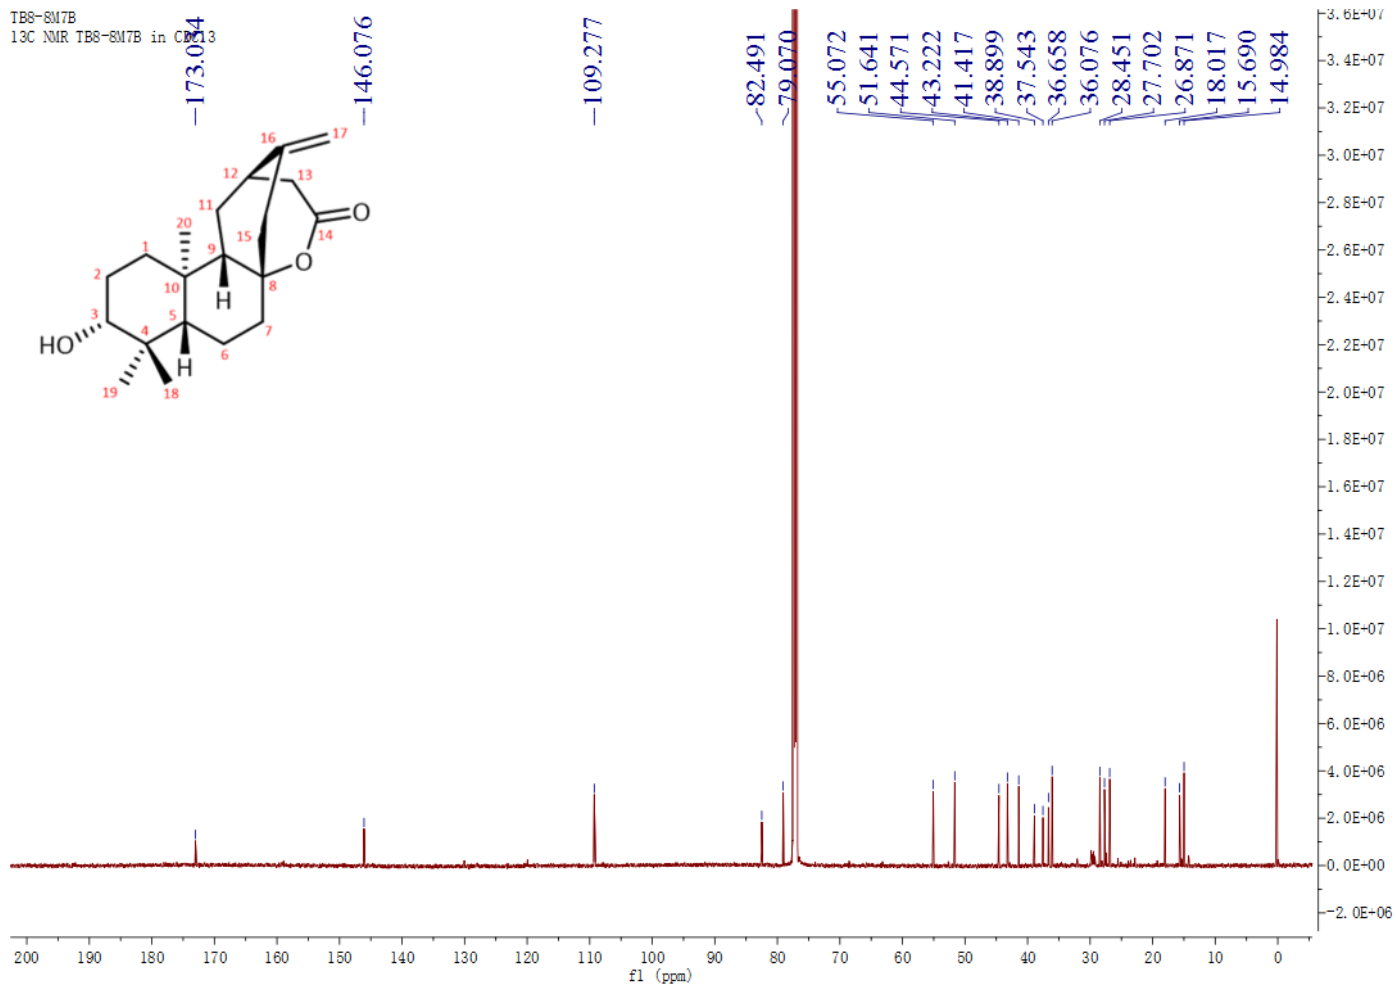

Figure S7-12. The <sup>13</sup>C-NMR Spectrum of compound 2 in CDCl<sub>3</sub> (150MHz)

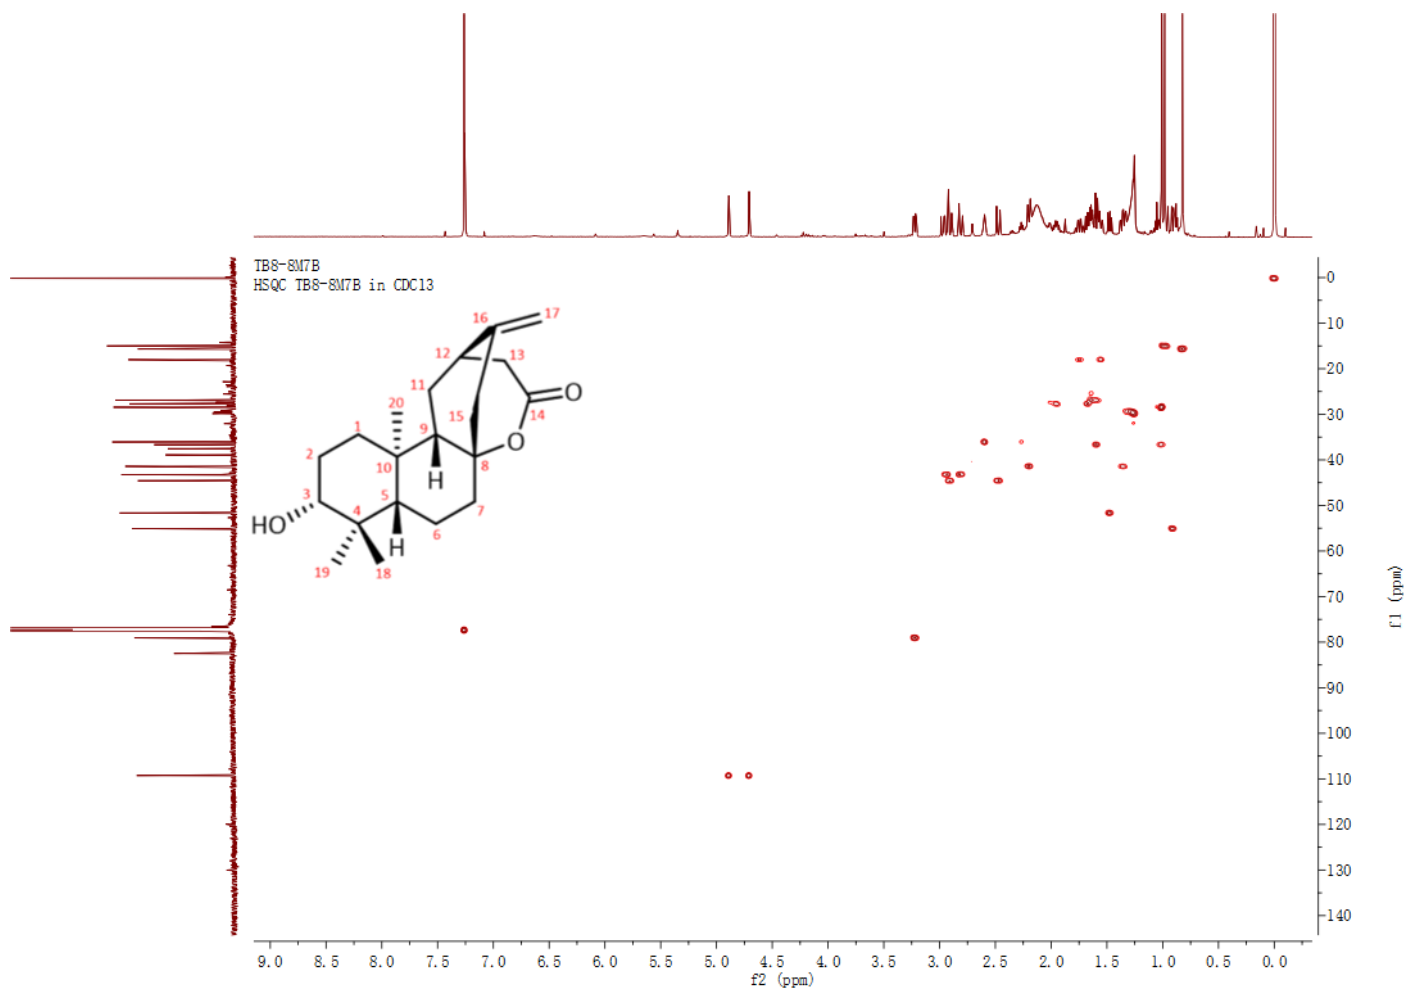

**Figure S7-13.** The HSQC Spectrum of compound **2** in CDCl<sub>3</sub> (600MHz)

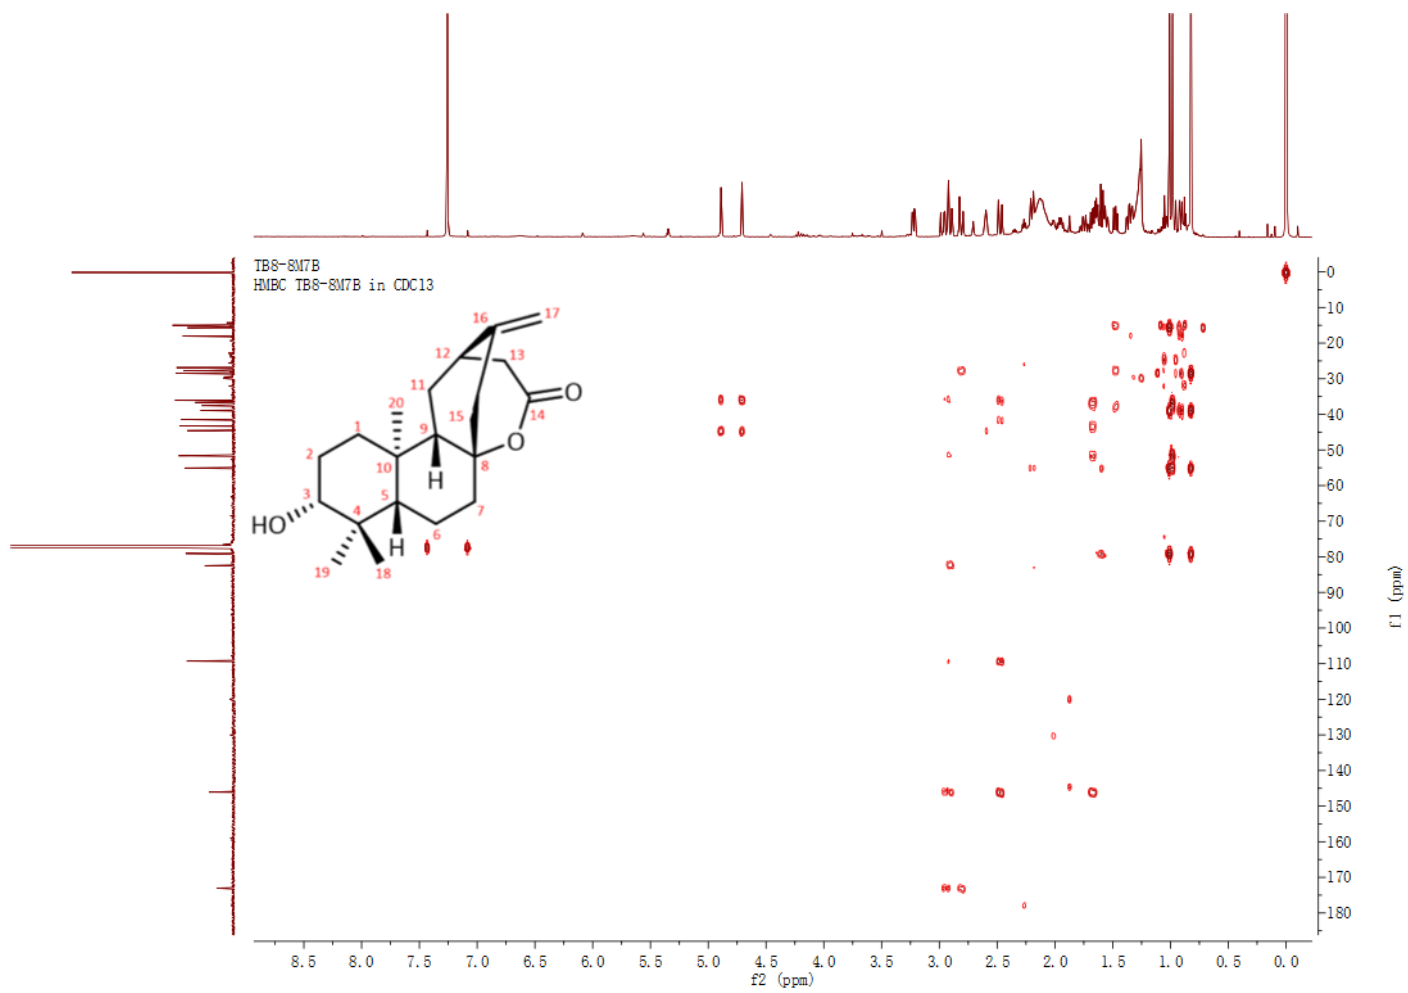

**Figure S7-14.** The HMBC Spectrum of compound **2** in CDCl<sub>3</sub> (600MHz)

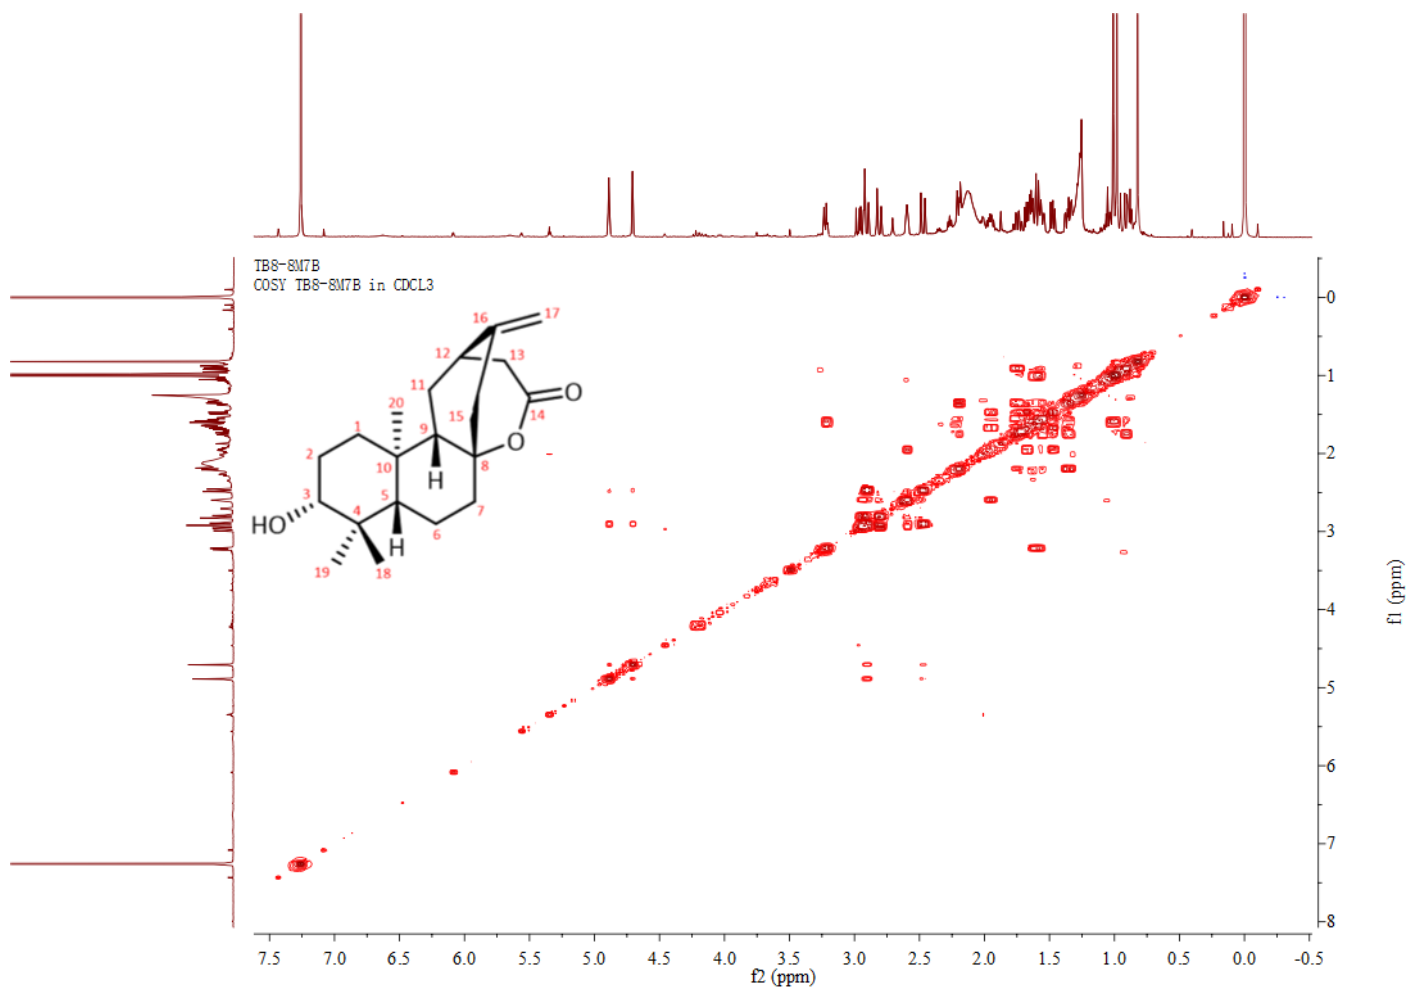

**Figure S7-15.** The COSY Spectrum of compound **2** in CDCl<sub>3</sub> (600MHz)



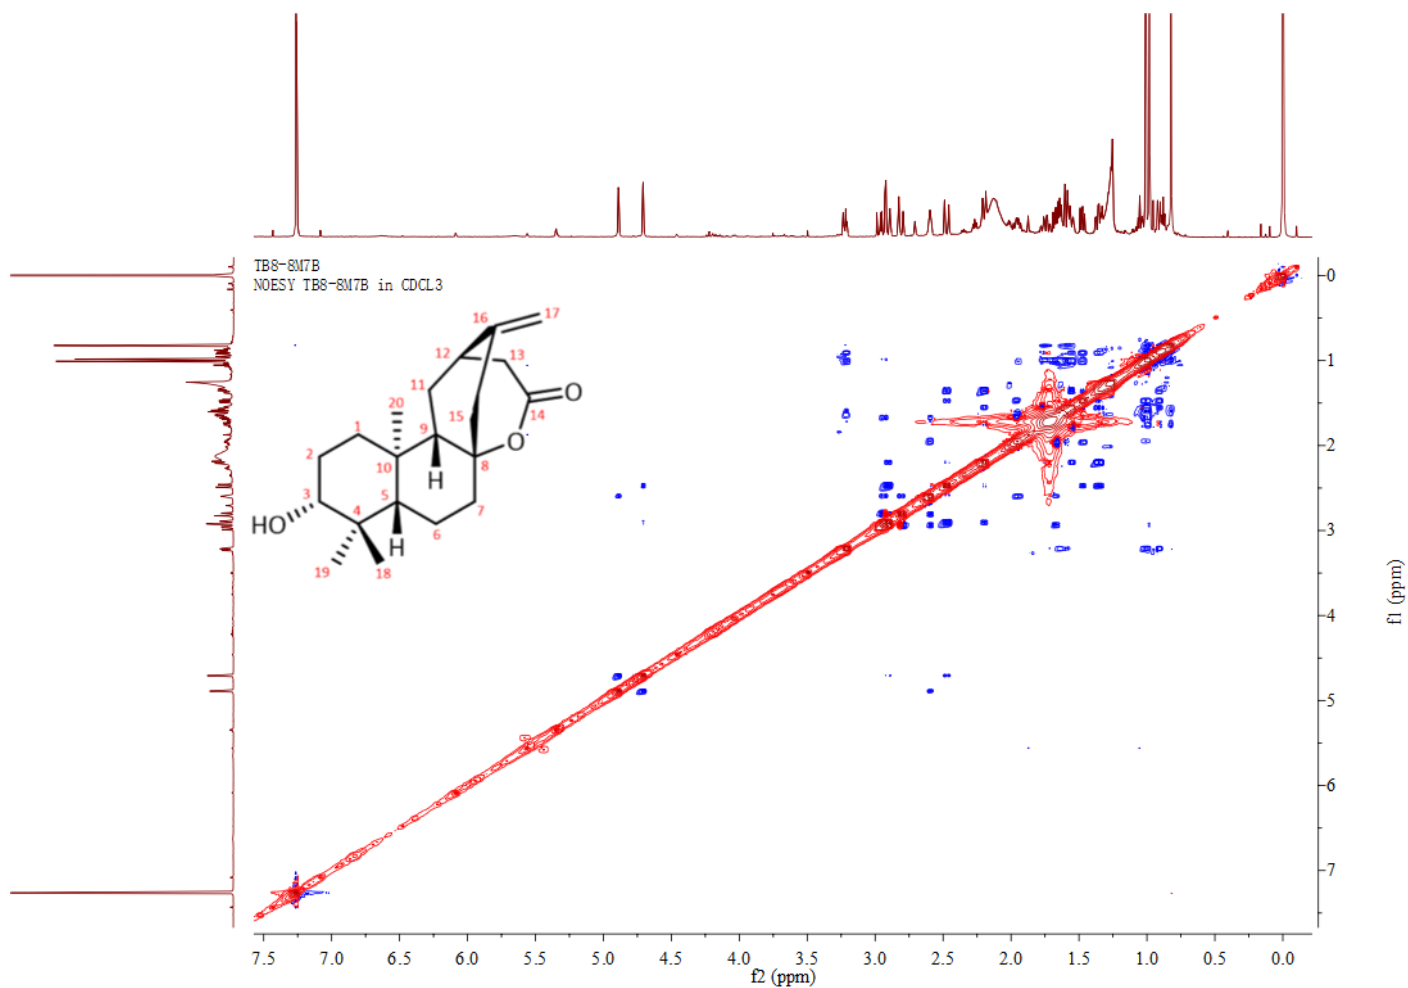

**Figure S7-16.** The ROESY Spectrum of compound **2** in CDCl<sub>3</sub> (600MHz)

## S8. References

- Neese, F. (2012) *Wires. Comput. Mol. Sci.* 2, 73-78.  
 Neese, F. (2017) *Wires. Comput. Mol. Sci.* 8, e1327.  
 Stephens, P.J., Harada, N. (2010) *Chirality* 22, 229–233.  
 Sybyl Software, version X 2.0; Tripos Associates Inc.: St. Louis, MO, 2013.
